# Supplementary material
Source: Springer Nature journal article supplement (https://www.springermedizin.de/resource/supplementary/13075_2009_2783_MOESM2_ESM.pdf/9692880)

Relative amount

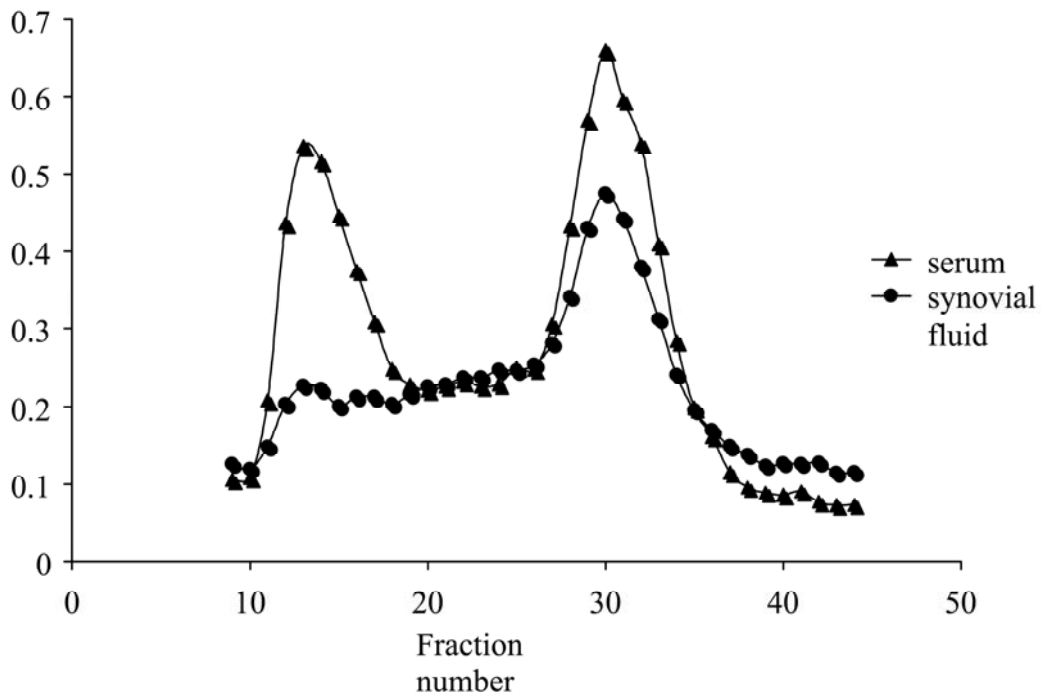

Supplement: MOESM2 [file 9692880]
